# Supplementary material for: The lncRNA ENSG00000254041.1 promotes cell invasiveness and associates with poor prognosis of pancreatic ductal adenocarcinoma
Source: publisher site journal article supplement (doi:10.18632/aging.102835), 2020-02-23
Supplement: Supplementary file [file aging-v12i4-102835-supplementary-material-SD1.pdf]

SUPPLEMENTARY FIGURES

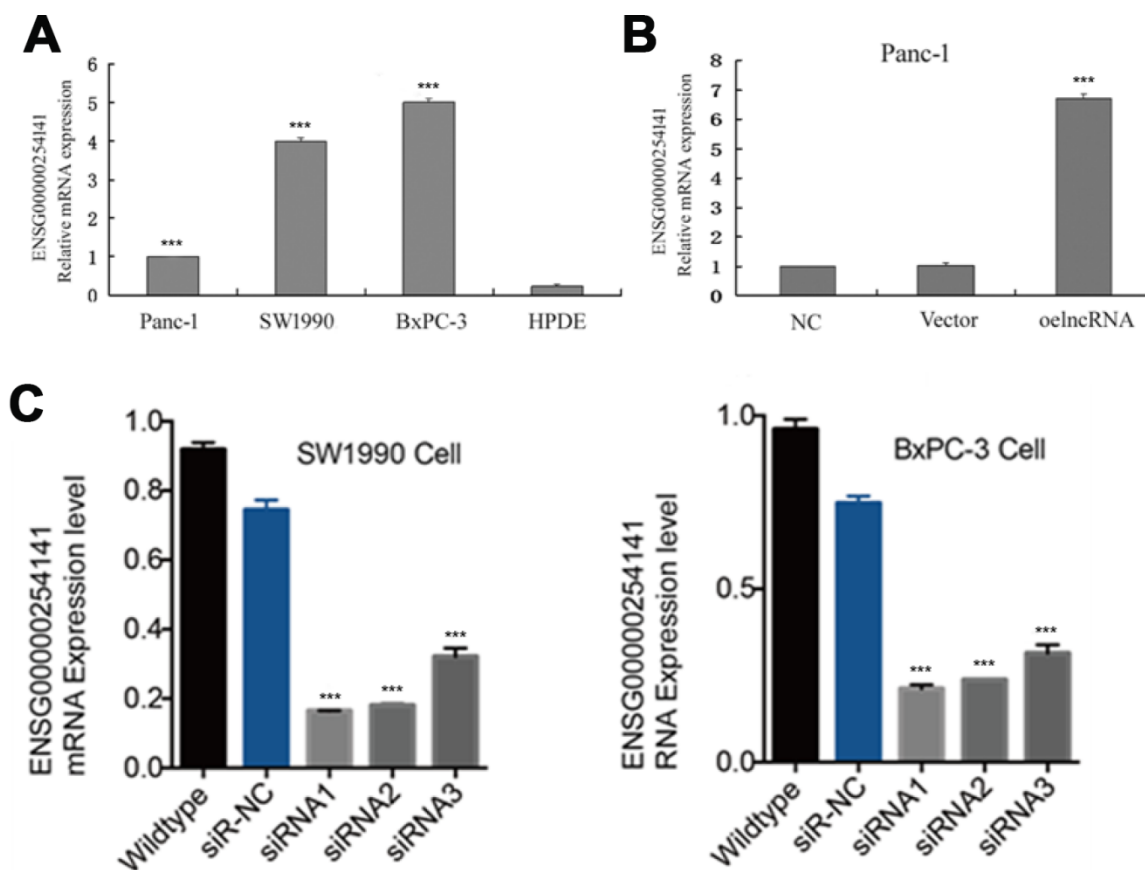

**Supplementary Figure 1.** (A) The baseline expression levels of ENSG00000254041.1 in human pancreatic cancer cell lines (SW1990, BxPC-3 and Panc-1) and normal pancreatic epithelial cell line (HPDE),  $***p < 0.001$  compared with HPDE. (B) The transfection efficiency of overexpression vector in Panc-1 cell line.  $***p < 0.001$  compared with NC and Mock vector. (C) The suppression efficiency of three siRNAs in SW1990 and BxPC-3 cell lines.  $***p < 0.001$  compared with si-NC.

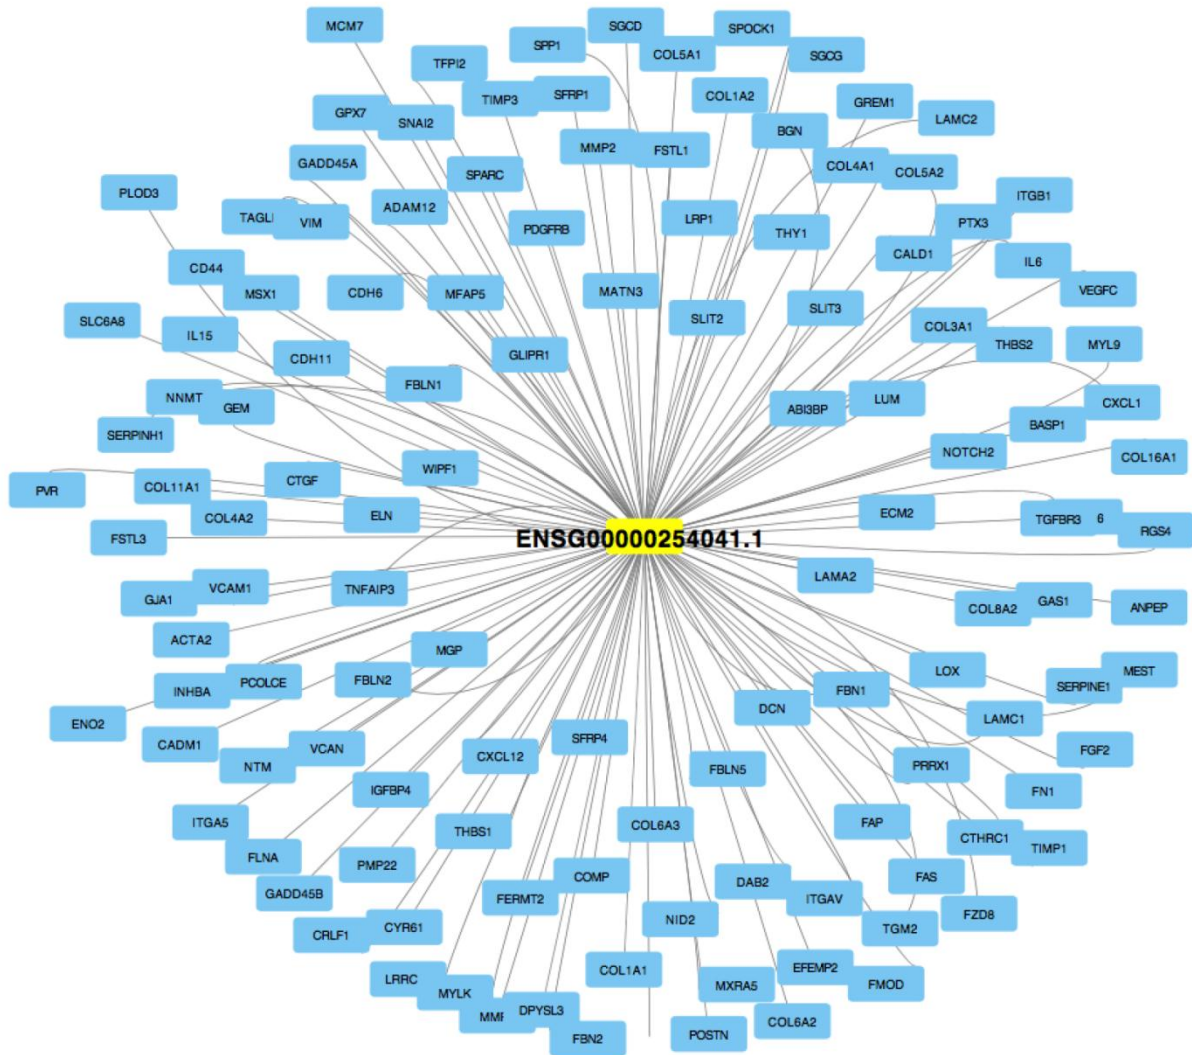

Supplementary Figure 2. LncRNA ENSG00000254041 and EMT Pathway Co-expression Analysis.
